# Supplementary material for: Reactivity of Ir(i)-aminophosphane platforms towards oxidants
Source: Royal Society of Chemistry journal article supplement (doi:10.1039/d3dt02361c), 2023-01-01
Supplement: d3dt02361c2.pdf [file d3dt02361c2.pdf]

## Reactivity of Ir(I)-aminophosphane platforms towards oxidants

Marco Palmese, Jesús J. Pérez-Torrente, Vincenzo Passarelli

*<sup>1</sup>H, <sup>31</sup>P{<sup>1</sup>H} and <sup>13</sup>C{<sup>1</sup>H} NMR spectra of **1**, **2Cl**, **3**, **4**, **5**[PF<sub>6</sub>]<sub>2</sub>, **6I**, **7a/b**PF<sub>6</sub>, **8**CF<sub>3</sub>SO<sub>3</sub>.*

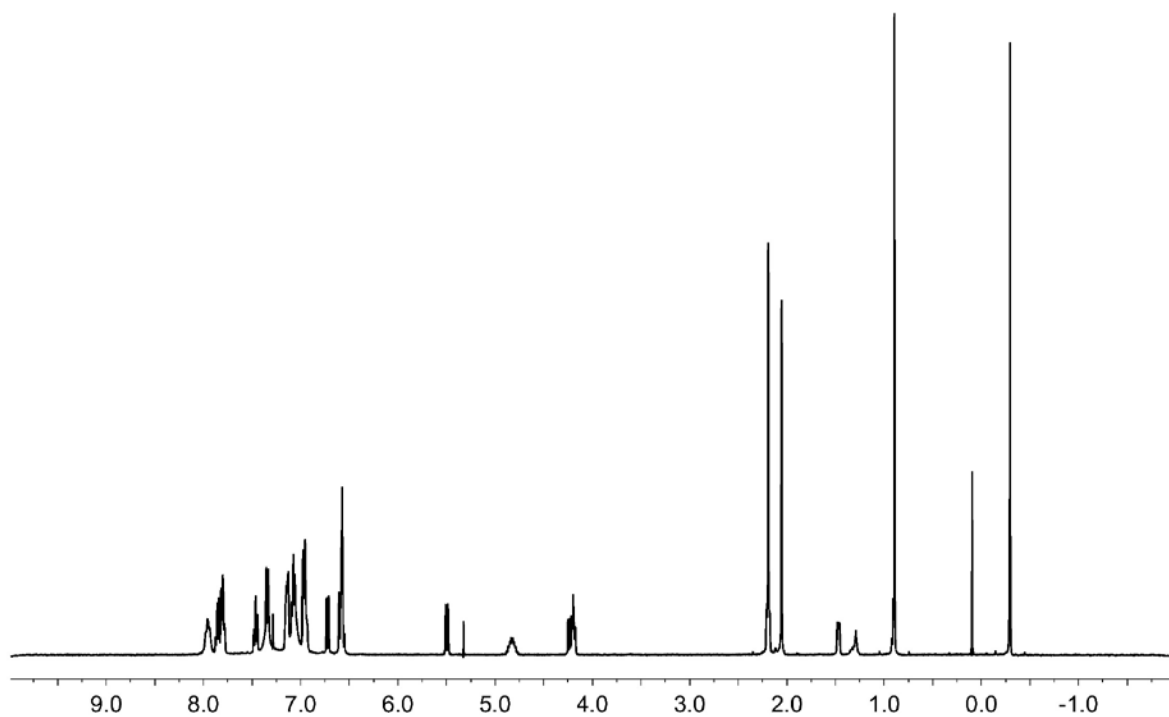

**Figure 1.**  $^1\text{H}$  NMR spectrum of **1** ( $\text{CD}_2\text{Cl}_2$ , 298 K).

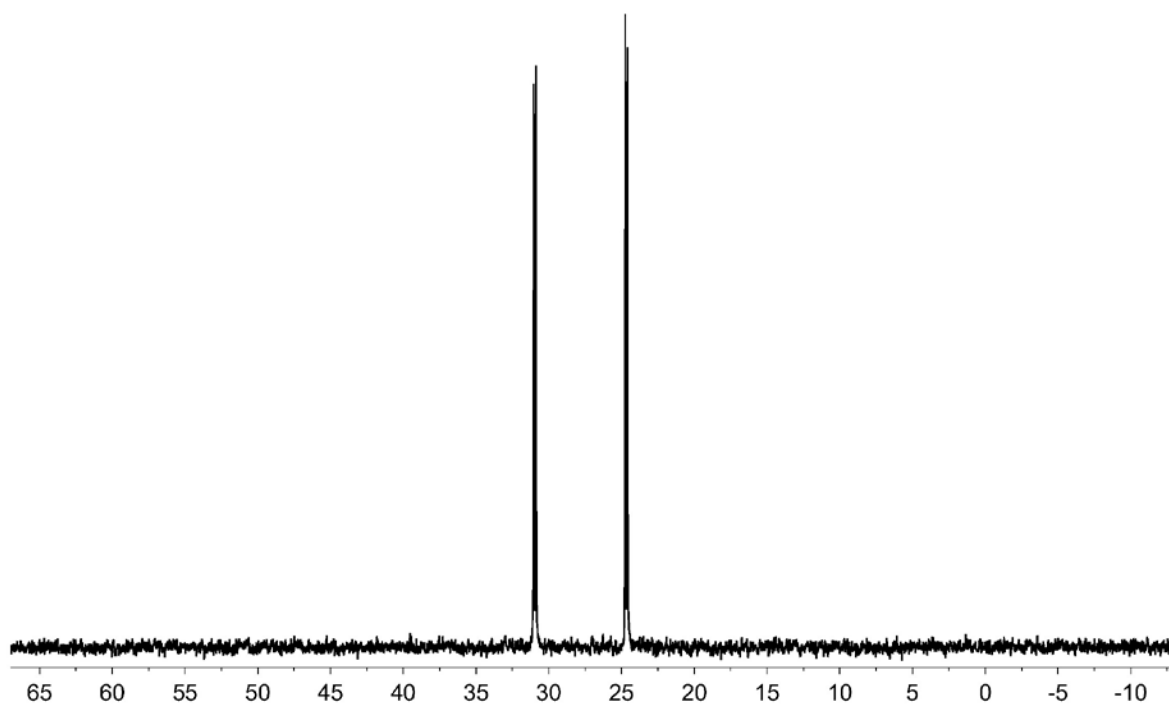

**Figure 2.**  $^{31}\text{P}\{^1\text{H}\}$  apt NMR spectrum of **1** ( $\text{CD}_2\text{Cl}_2$ , 298 K).

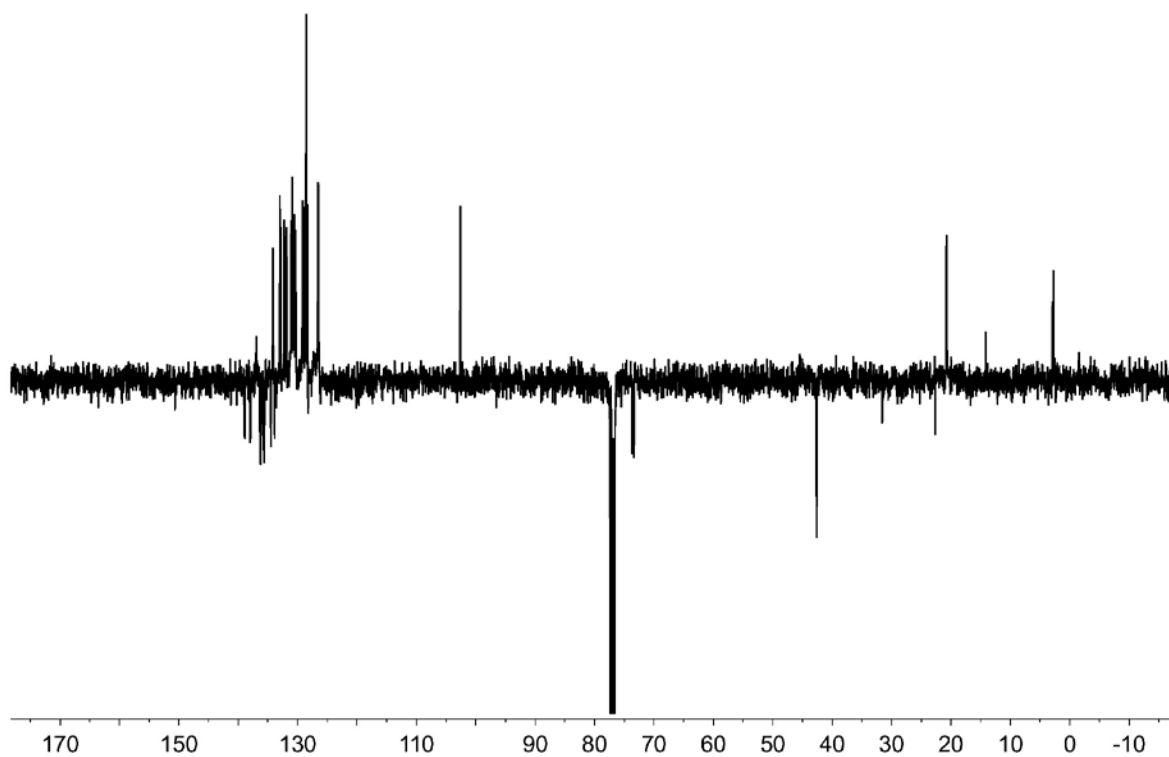

**Figure 3.**  $^{13}\text{C}\{^1\text{H}\}$  apt NMR spectrum of **1** ( $\text{CD}_2\text{Cl}_2$ , 298 K).

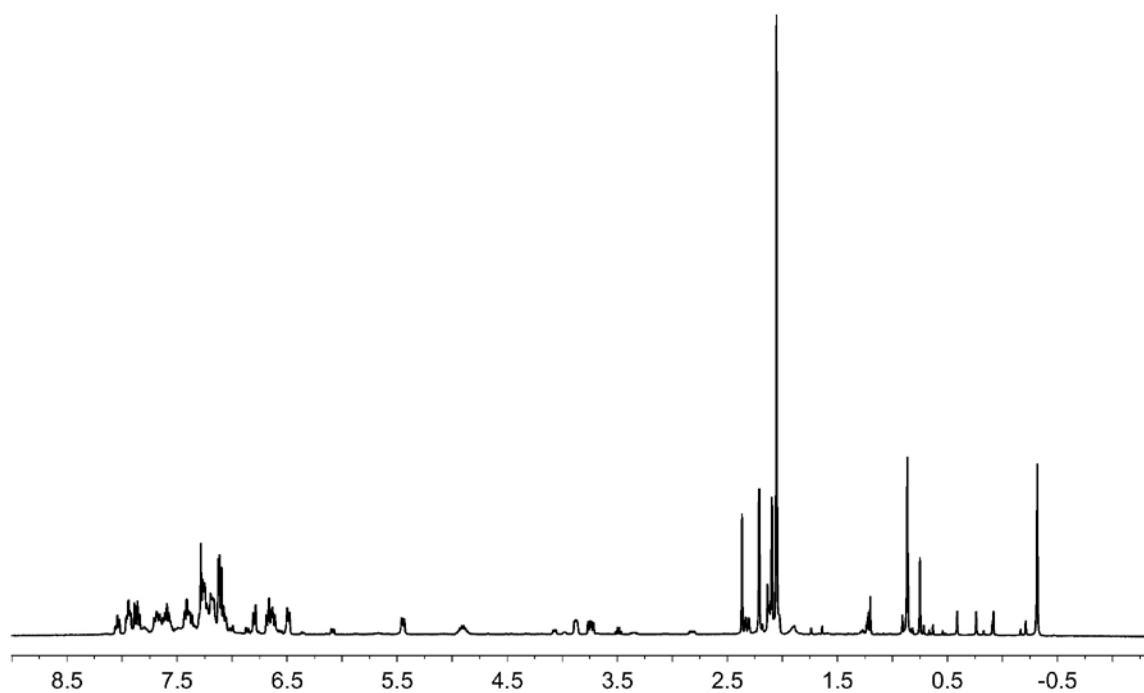

**Figure 4.**  $^1\text{H}$  NMR spectrum of **2Cl** ( $\text{CD}_2\text{Cl}_2$ , 298 K).

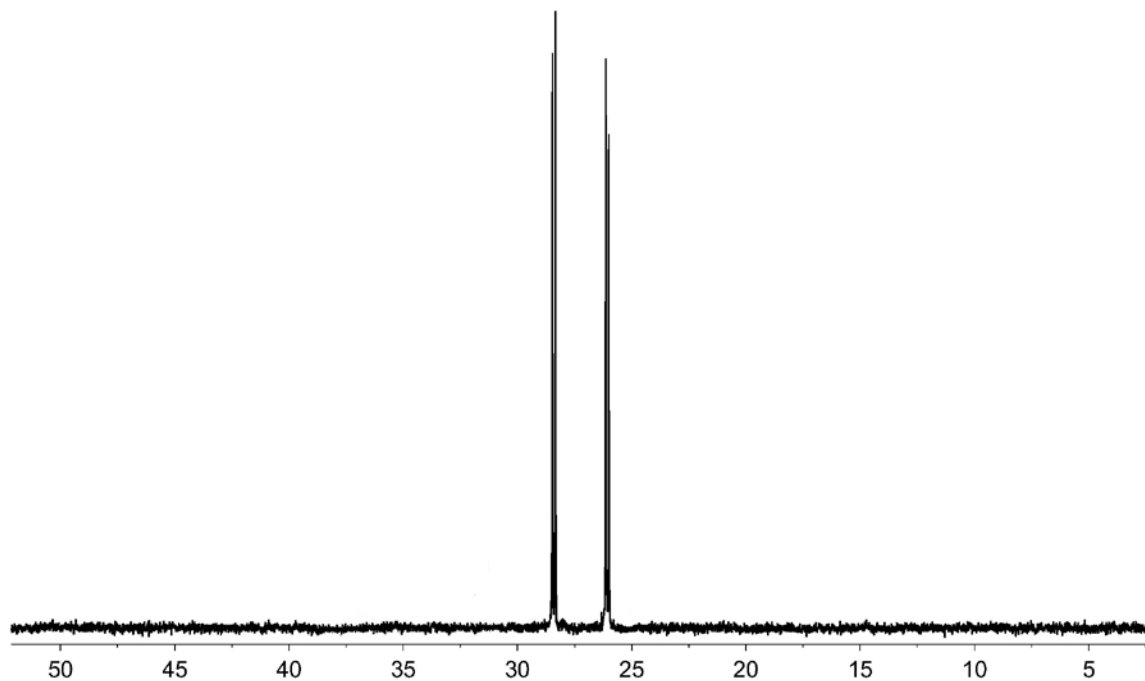

**Figure 5.**  $^{31}\text{P}\{^1\text{H}\}$  apt NMR spectrum of **2Cl** ( $\text{CD}_2\text{Cl}_2$ , 298 K).

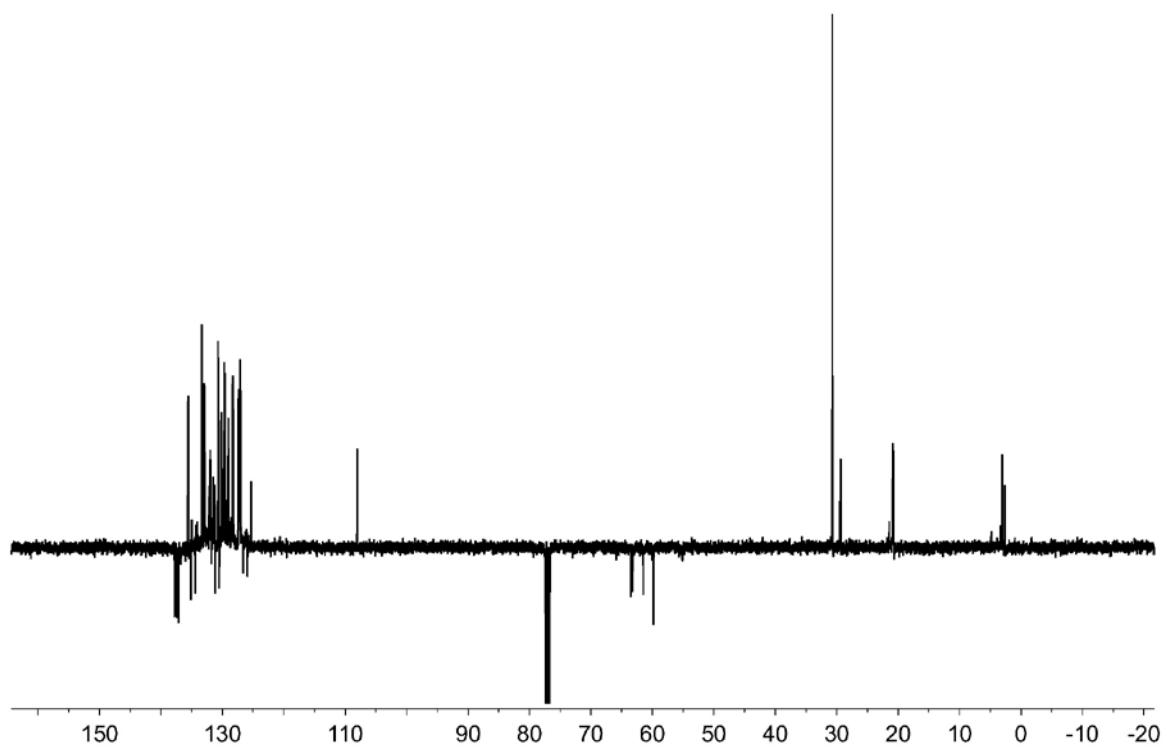

**Figure 6.**  $^{13}\text{C}\{^1\text{H}\}$  apt NMR spectrum of **2Cl** ( $\text{CD}_2\text{Cl}_2$ , 298 K).

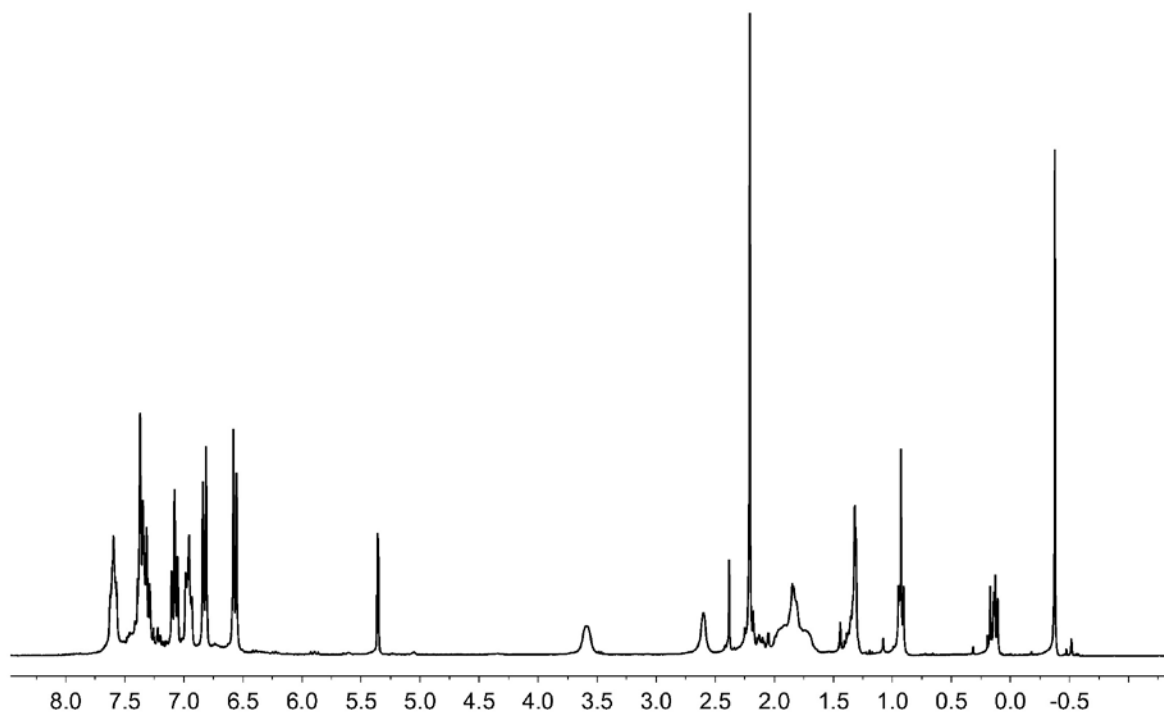

**Figure 7.**  $^1\text{H}$  NMR spectrum of **4** ( $\text{CD}_2\text{Cl}_2$ , 298 K).

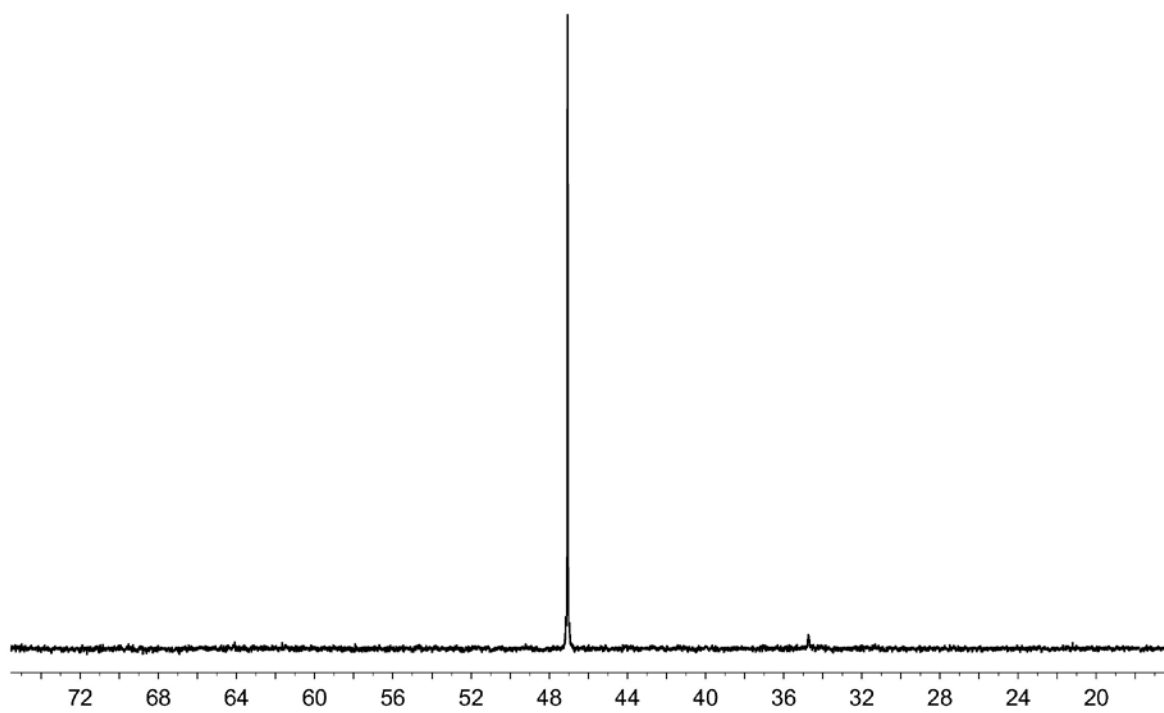

**Figure 8.**  $^{31}\text{P}\{^1\text{H}\}$  apt NMR spectrum of **4** ( $\text{CD}_2\text{Cl}_2$ , 298 K).

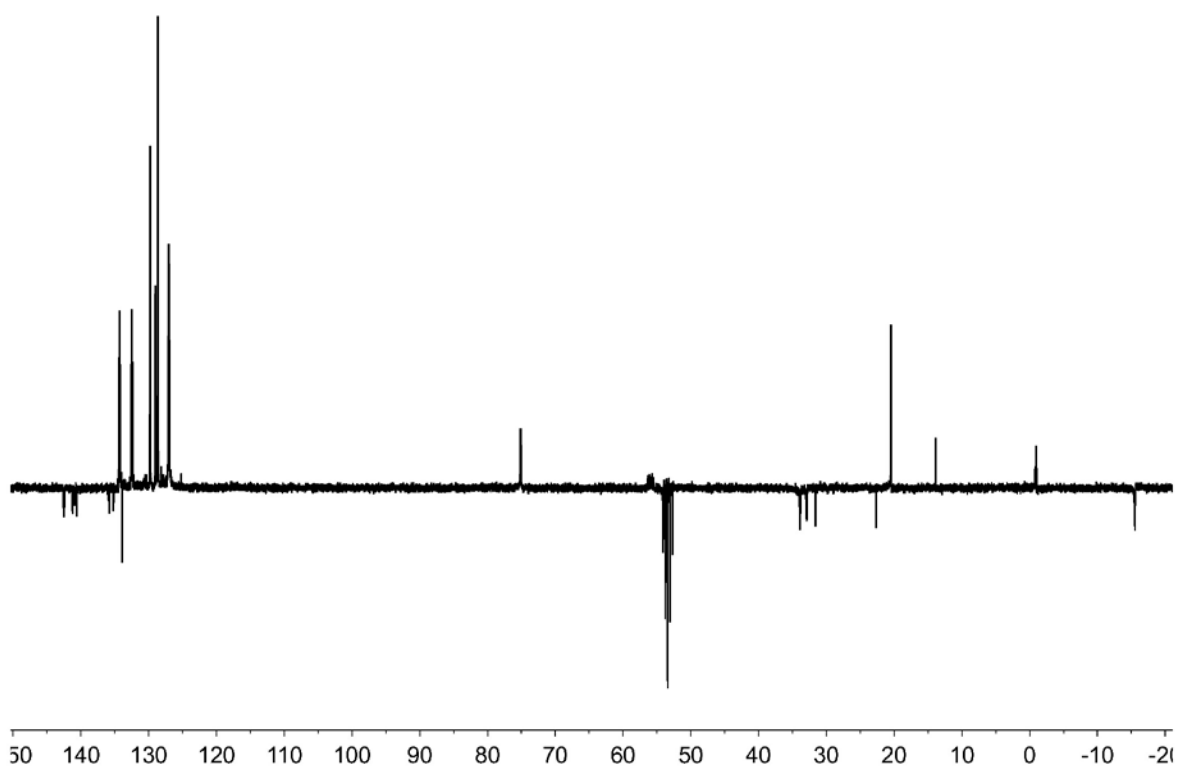

**Figure 9.**  $^{13}\text{C}\{^1\text{H}\}$  apt NMR spectrum of **4** ( $\text{CD}_2\text{Cl}_2$ , 298 K).

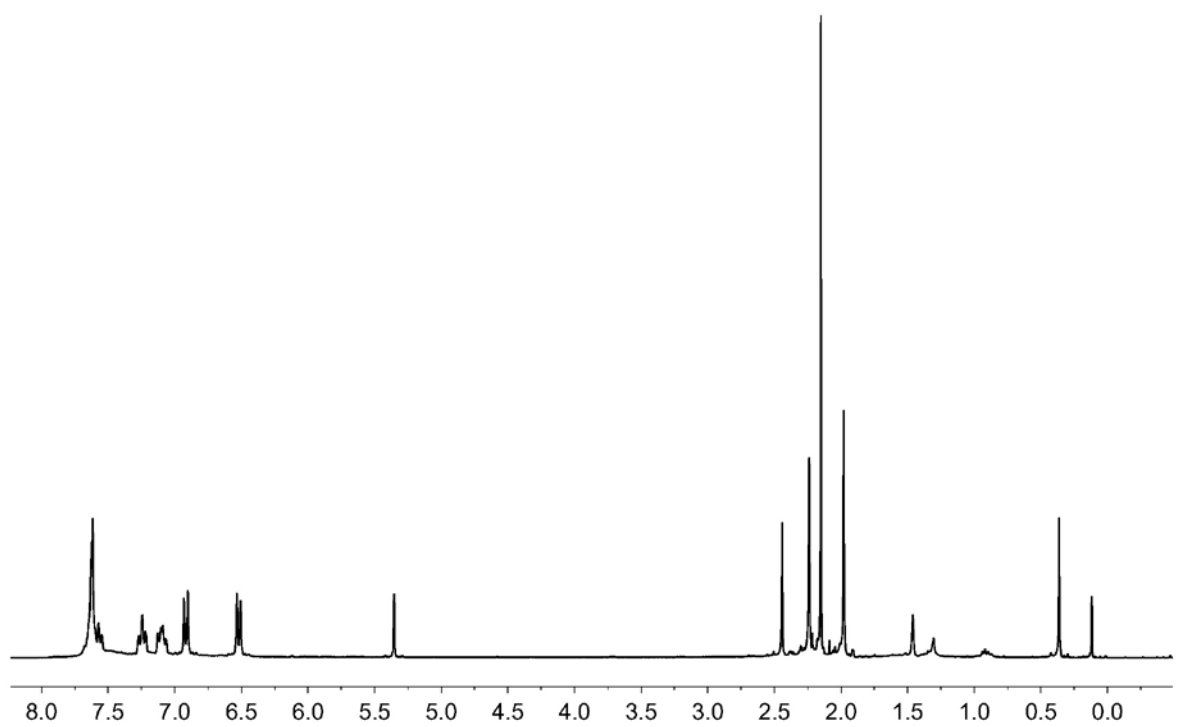

**Figure 10.**  $^1\text{H}$  NMR spectrum of **5** ( $\text{CD}_2\text{Cl}_2$ , 298 K).

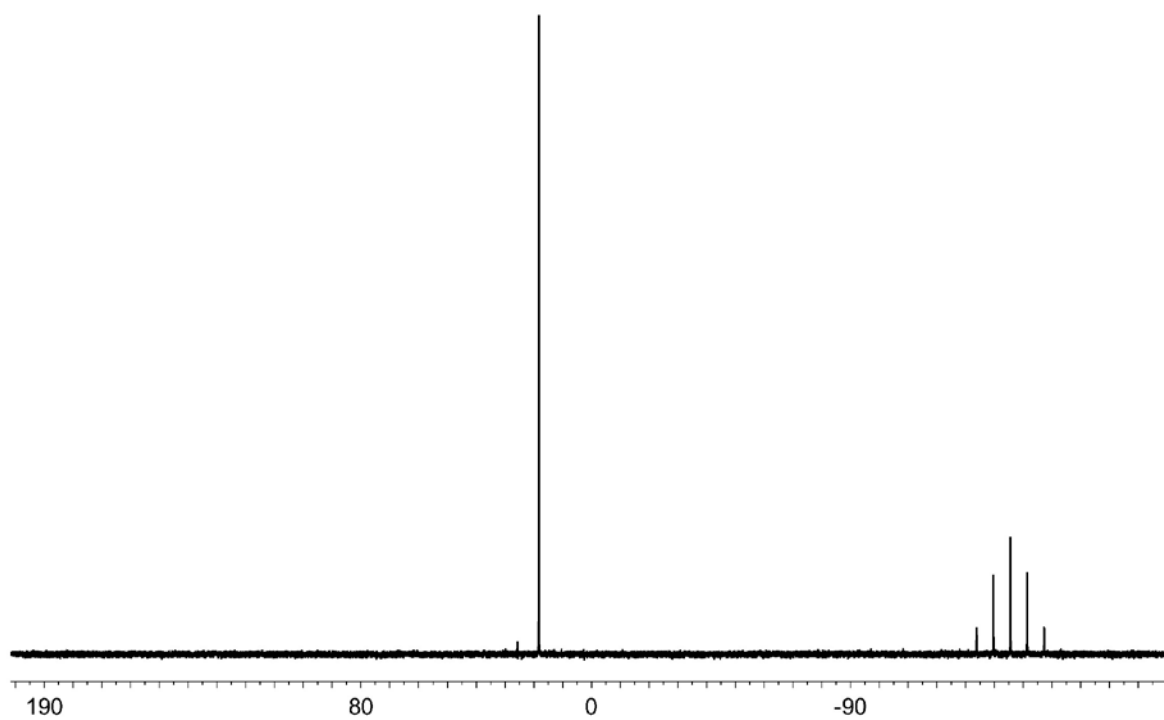

**Figure 11.**  $^{31}\text{P}\{^1\text{H}\}$  apt NMR spectrum of **5** ( $\text{CD}_2\text{Cl}_2$ , 298 K).

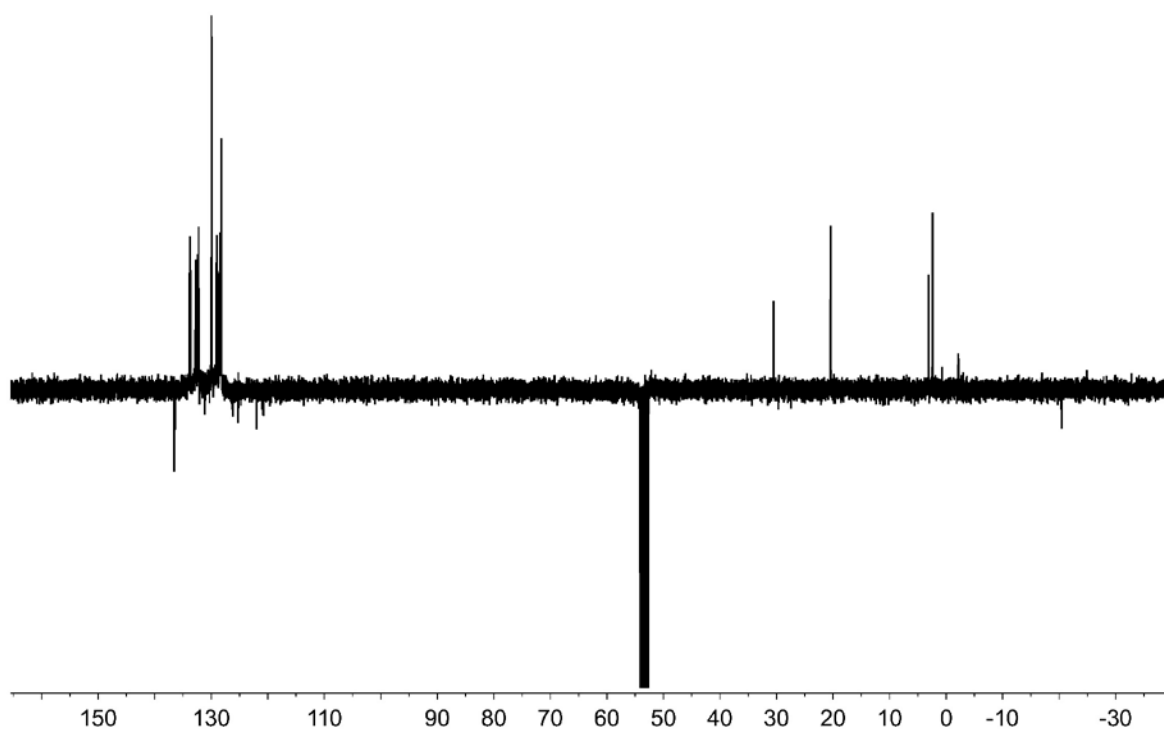

**Figure 12.**  $^{13}\text{C}\{^1\text{H}\}$  apt NMR spectrum of **5** ( $\text{CD}_2\text{Cl}_2$ , 298 K).

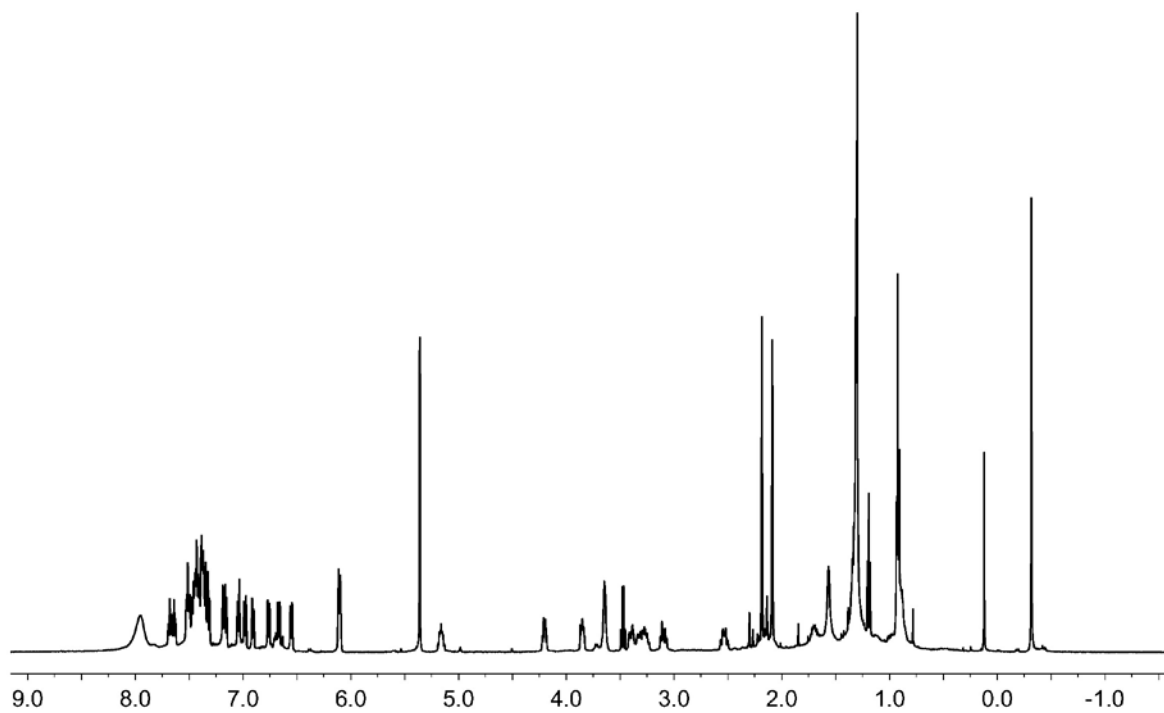

**Figure 13.**  $^1\text{H}$  NMR spectrum of **6I** ( $\text{CD}_2\text{Cl}_2$ , 298 K).

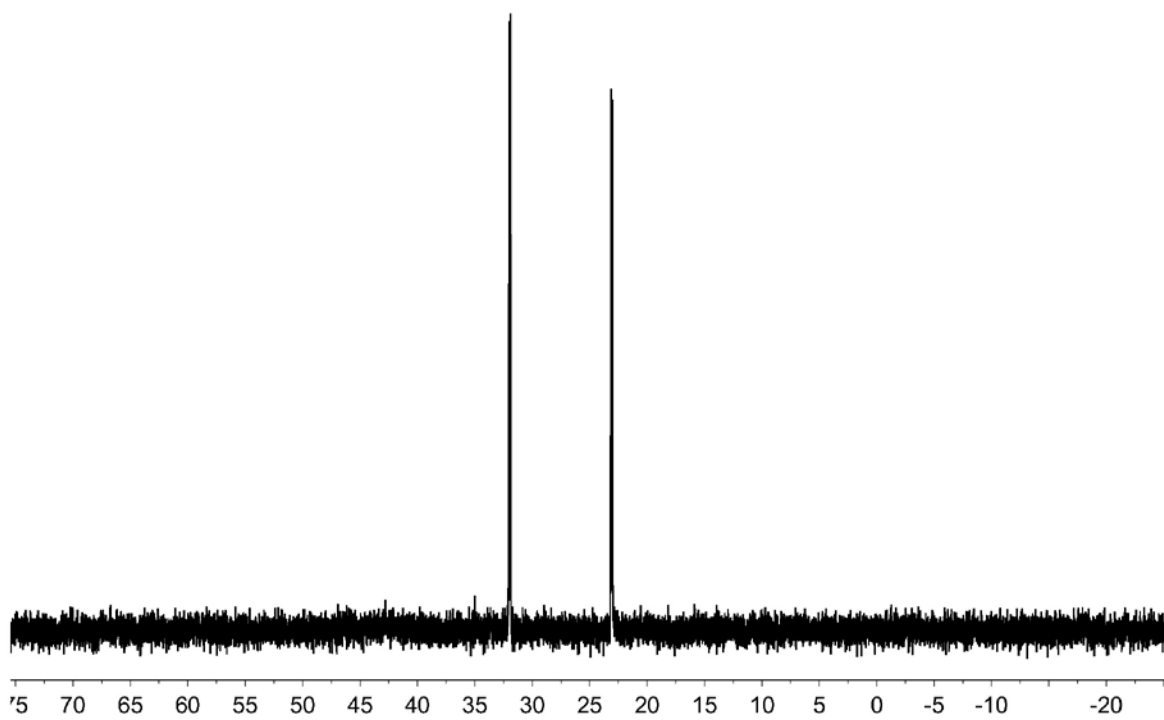

**Figure 14.**  $^{31}\text{P}\{^1\text{H}\}$  apt NMR spectrum of **6I** ( $\text{CD}_2\text{Cl}_2$ , 298 K).



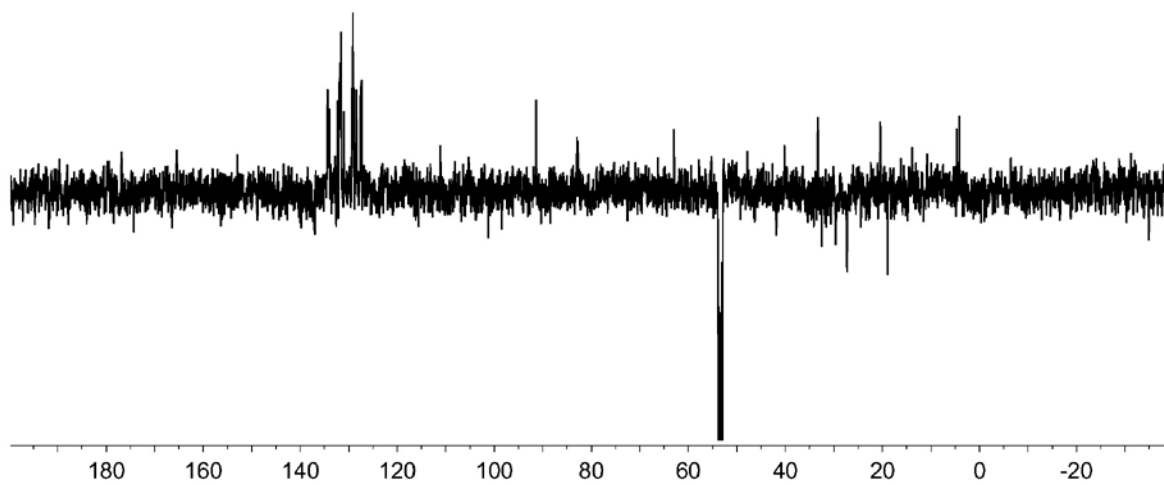

**Figure 15.**  $^{13}\text{C}\{^1\text{H}\}$  apt NMR spectrum of **6I** ( $\text{CD}_2\text{Cl}_2$ , 298 K).

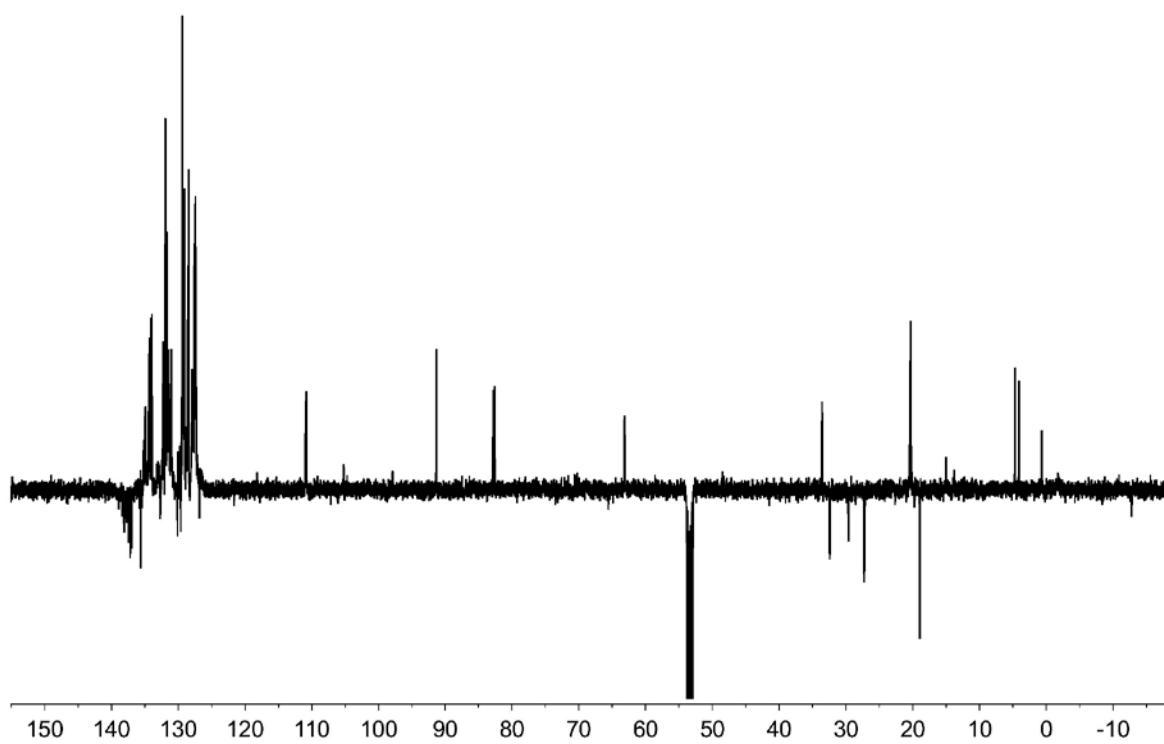

**Figure 16.**  $^{13}\text{C}\{^1\text{H}\}$  apt NMR spectrum of **6I** + **7a/bI** ( $\text{CD}_2\text{Cl}_2$ , 298 K).

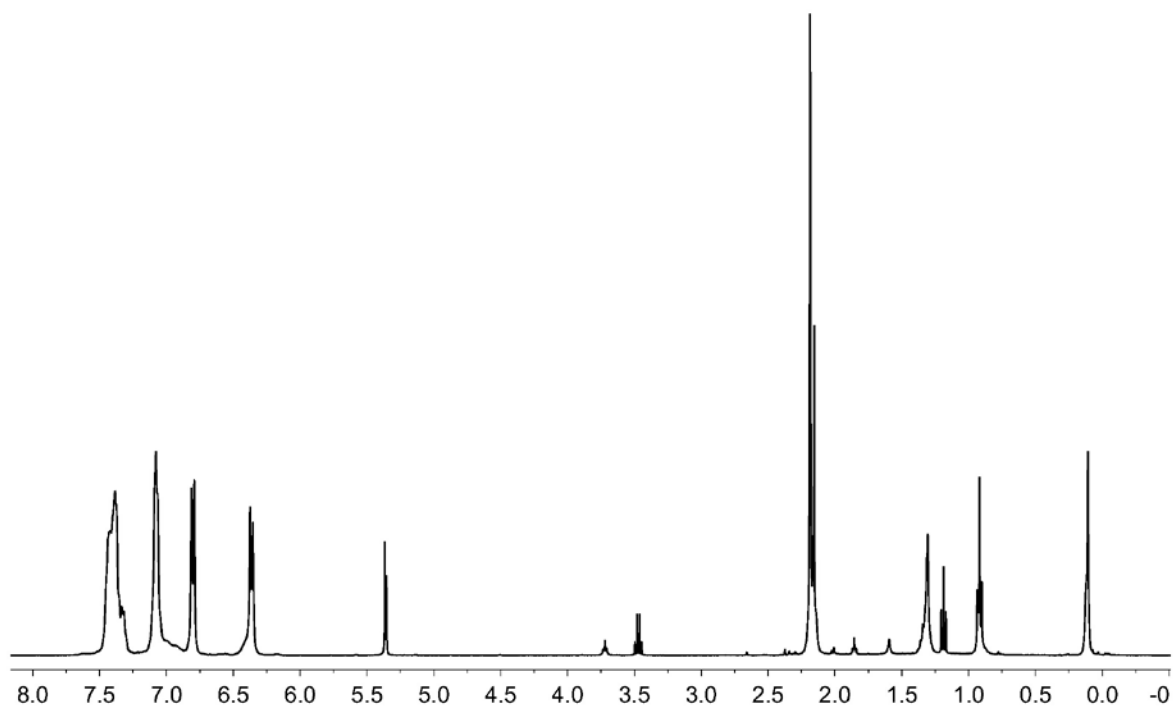

**Figure 17.**  $^1\text{H}$  NMR spectrum of  $7\text{aPF}_6 + 7\text{bPF}_6$  ( $\text{CD}_2\text{Cl}_2$ , 298 K).

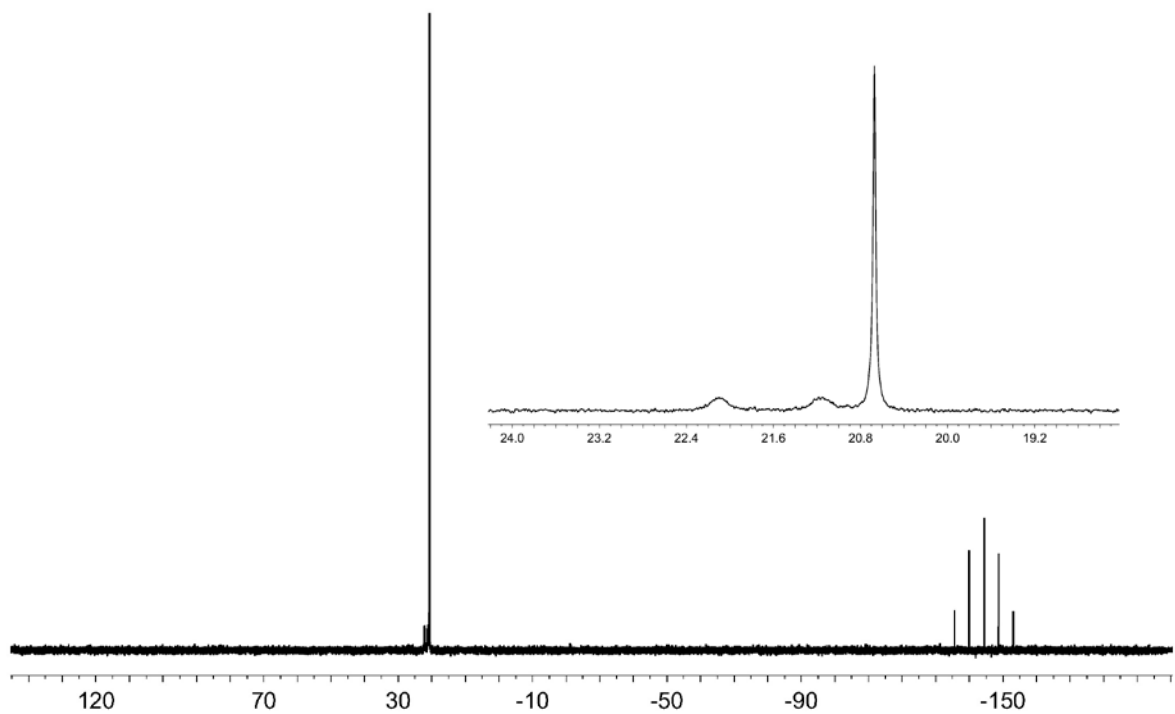

**Figure 18.**  $^{31}\text{P}\{^1\text{H}\}$  apt NMR spectrum of  $7\text{aPF}_6 + 7\text{bPF}_6$  ( $\text{CD}_2\text{Cl}_2$ , 298 K).

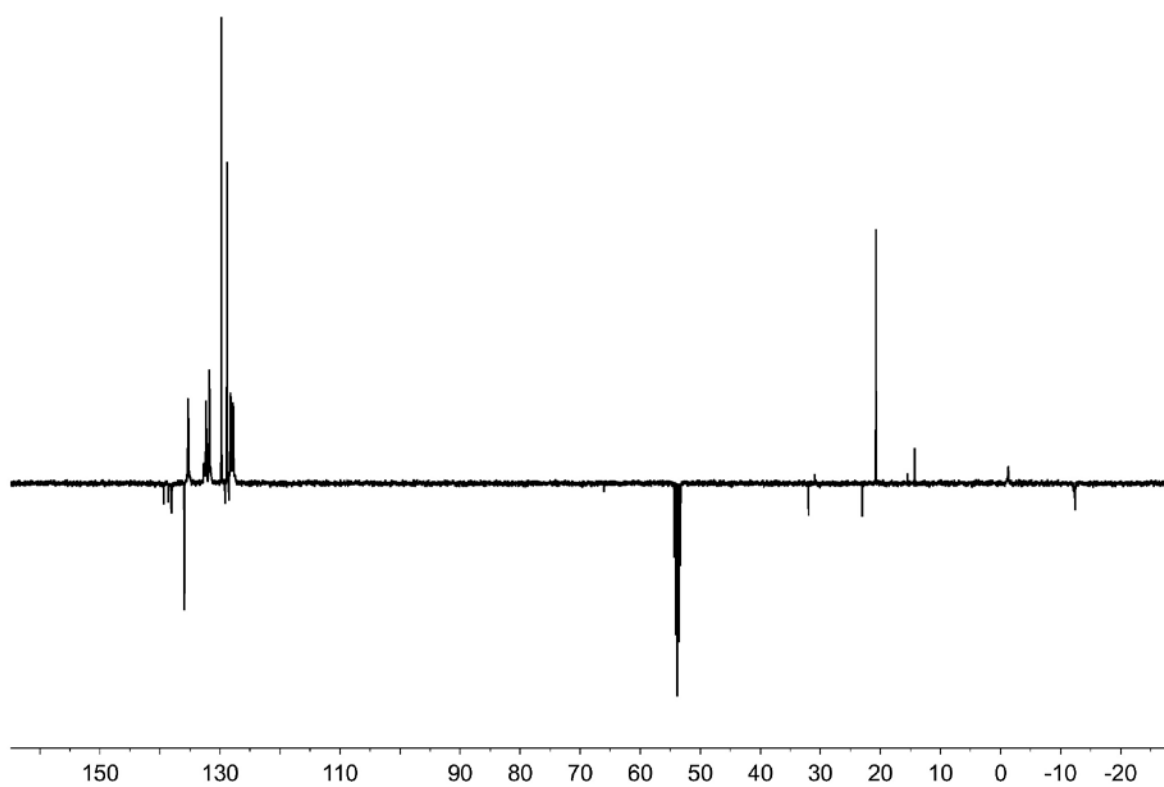

**Figure 19.**  $^{13}\text{C}\{^1\text{H}\}$  apt NMR spectrum of **7a**PF<sub>6</sub> + **7b**PF<sub>6</sub> (CD<sub>2</sub>Cl<sub>2</sub>, 298 K).

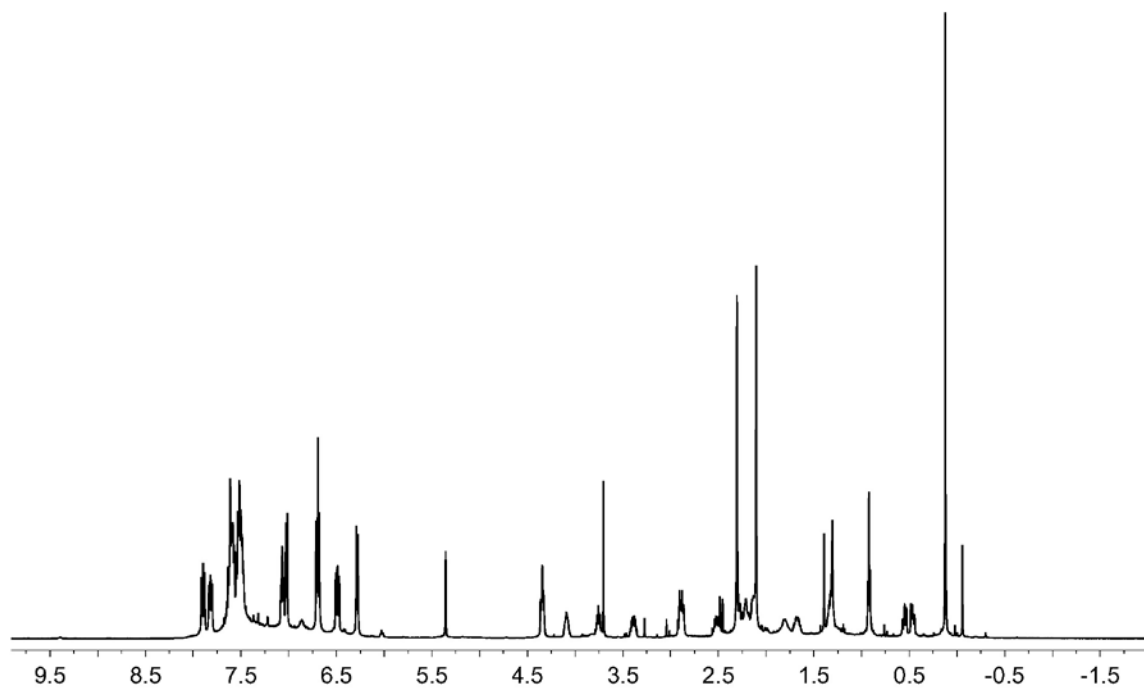

**Figure 20.**  $^1\text{H}$  NMR spectrum of **8**CF<sub>3</sub>SO<sub>3</sub> (CD<sub>2</sub>Cl<sub>2</sub>, 298 K).

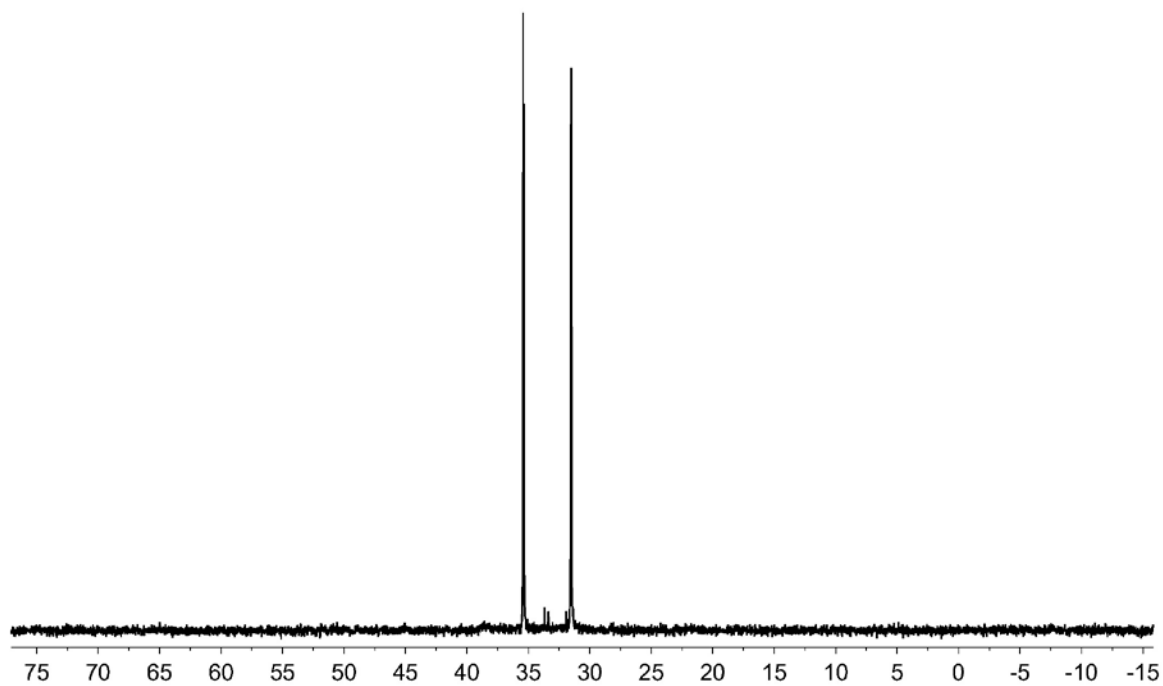

**Figure 21.**  $^{31}\text{P}\{^1\text{H}\}$  apt NMR spectrum of  $8\text{CF}_3\text{SO}_3$  ( $\text{CD}_2\text{Cl}_2$ , 298 K).

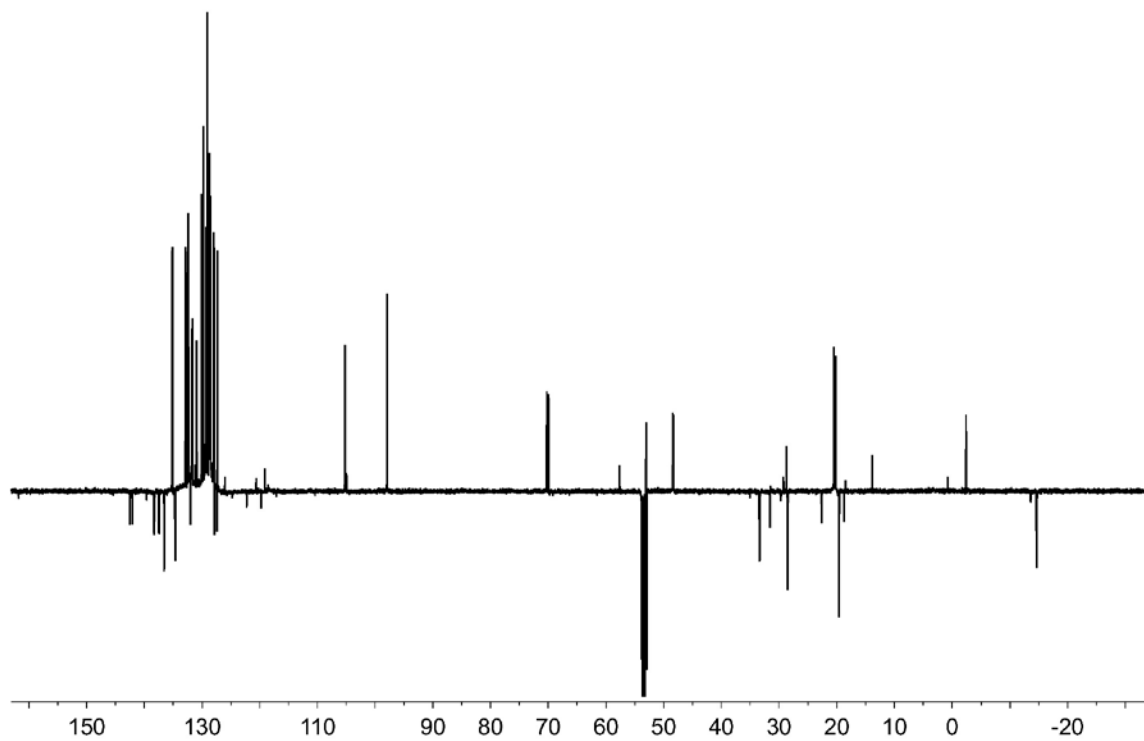

**Figure 22.**  $^{13}\text{C}\{^1\text{H}\}$  apt NMR spectrum of  $8\text{CF}_3\text{SO}_3$  ( $\text{CD}_2\text{Cl}_2$ , 298 K).
